# Supplementary material for: Prolonged post-operative hydrocodone usage due to psychotropic drug interaction
Source: publisher site journal article supplement (doi:10.1515/dmpt-2024-0031), 2024-12-15
Supplement: Supplementary file 1 [file j_dmpt-2024-0031_suppl_006.docx]

**Table S6. Subset analysis of adjusted effects based on CYP2D6 inhibitor strength**

| **Outcome Variable** | **Adjusted Effect** | **95% Confidence Interval** | ***p-value*** |
| --- | --- | --- | --- |
| Total Dose | 17.8 | -25.6 to 61.1 | 0.420 |
| Pain Index | 0.47 | -0.52 to 1.46 | 0.354 |
| Side Effect Score | 0.14 | -1.18 to 1.45 | 0.838 |
| Days of Hydrocodone Use (N=113; fold-increase) | 6.1 | 2.9 to 13.0 | ***< 0.001*** |
